# Supplementary material for: Human Ubiquitin-Specific Peptidase 18 Is Regulated by microRNAs via the 3'Untranslated Region, A Sequence Duplicated in Long Intergenic Non-coding RNA Genes Residing in chr22q11.21
Source: PubMed Central journal article supplement (PMC7901961; doi:10.3389/fgene.2020.627007), 2021-02-03
Supplement: Data_Sheet_1.pdf [file Data_Sheet_1.pdf]

**Supplementary Information for:**

**Human USP18 is regulated by miRNAs *via* the 3'UTR, a sequence duplicated in lincRNA genes residing in chr22q11.21**

Erminia Rubino<sup>1,2</sup>, Melania Cruciani<sup>1</sup>, Nicolas Tchitchek<sup>2,3</sup>, Anna Le Tortorec<sup>4</sup>, Antoine D. Rolland<sup>4</sup>, Önay Veli<sup>1</sup>, Leslie Vallet<sup>1</sup>, Giulia Gaggi<sup>1</sup>, Frédérique Michel<sup>1</sup>, Nathalie Dejuq-Rainsford<sup>4</sup>, Sandra Pellegrini<sup>1\*</sup>

<sup>1</sup> Unit of Cytokine Signaling, Institut Pasteur, INSERM U1221, Paris, France

<sup>2</sup> École Doctorale Physiologie, Physiopathologie et Thérapeutique, ED394, Sorbonne Université, Paris, France

<sup>3</sup> i3 research unit, Hôpital Pitié-Salpêtrière-Sorbonne Université, Paris, France

<sup>4</sup> UMR\_S1085, Irset (Institut de recherche en santé, environnement et travail), EHESP, Inserm, Univ Rennes, F-35000 Rennes, France.

\*Corresponding author : Sandra Pellegrini

Email: [sandra.pellegrini@pasteur.fr](mailto:sandra.pellegrini@pasteur.fr)

**This PDF file includes:**

Supplementary Tables S1 and S2

Supplementary Figures S1 to S9

Supplementary Sequences

**Supplementary Table S1. Copies of the sequences annotated as exon 1 of *FAM247A-D* and *linc-UR-B1*.**

| Coordinates <sup>a</sup>                    | Strand <sup>b</sup> | Identity % (score) <sup>c</sup> |
|---------------------------------------------|---------------------|---------------------------------|
| <b><i>FAM247A-D</i></b>                     |                     |                                 |
| <b>chr22:18769207-18769785</b> <sup>d</sup> | -                   | 100 (578/578)                   |
| <b>chr22:18349936-18350514</b>              | +                   | 100 (578/578)                   |
| <b>chr22:21203454-21204032</b>              | -                   | 99.9 (576/578)                  |
| <b>chr22:18511886-18512464</b>              | +                   | 99.9 (576/578)                  |
| chr20:23980580-23981153                     | -                   | 96.2 (536/578)                  |
| chr13:18248901-18249486                     | -                   | 96.6 (533/578)                  |
| chr22:22651789-22652345                     | +                   | 96.6 (531/578)                  |
| chr22:24632871-24633427                     | +                   | 96.6 (525/578)                  |
| chr22:24244569-24245122                     | -                   | 96.6 (490/578)                  |
| <b><i>linc-UR-B1</i></b>                    |                     |                                 |
| <b>chr22:18861451-18861733</b>              | +                   | 100 (283/283)                   |
| chr22:21297396-21297678                     | +                   | 100 (283/283)                   |
| chr22:21112840-21113122                     | -                   | 99.7 (281/283)                  |
| chr6:162068502-162068656                    | -                   | 82.6 (101/283)                  |

<sup>a</sup> Blat was performed on human genome using *FAM247D* or *linc-UR-B1* annotated exon1 sequence as input.

<sup>b</sup> Refers to the genomic DNA strand

<sup>c</sup> Hits with identity > 80% and length > 100bp are shown.

<sup>d</sup> In bold coordinates referred to *FAM247A-D*.

## Supplementary Table S2. Sequences of the primers used.

| Primers           | Sequences 5'-3'                                                                  |
|-------------------|----------------------------------------------------------------------------------|
| USP18_qPCR_FW     | ACTCCTTGATTGCGTTGAC                                                              |
| USP18_qPCR_RV     | TTTCCCACGGGTCTTCTT                                                               |
| OAS1_qPCR_FW      | TTGACTGGCGGCTATAAACC                                                             |
| OAS1_qPCR_RV      | TGGGCTGTGTTGAAATGTGT                                                             |
| IRF7_qPCR_FW      | GGGTGTGCTTCCCTGGATA                                                              |
| IRF7_qPCR_RV      | GCTCCATAAGGAAGCACTCG                                                             |
| IFIT1_qPCR_FW     | TCTCAGAGGAGCCTGGCTAA                                                             |
| IFIT1_qPCR_RV     | TCAGGCATTTTCATCGTCATC                                                            |
| STAT2_qPCR_FW     | TATCACAGCCAGTGCCAGAG                                                             |
| STAT2_qPCR_RV     | CTGATTCCTCCTTGGAGA                                                               |
| 18S_qPCR_FW       | CATGGCCGTCTTAGTTGGT                                                              |
| 18S_qPCR_RV       | CGCTGAGCCAGTCAGTGTAG                                                             |
| ACTB_qPCR_FW      | TACAGCTTACCACCACGG                                                               |
| ACTB_qPCR_RV      | TGCTCGAAGTCCAGGGCGA                                                              |
| USP183UTR_XhoI_FW | CGCGCTCGAGTGGAATGCCCAAAACCTTC                                                    |
| USP183UTR_NotI_RV | GCGCGCGGCCGCTCATGACTGTGTTATCAC                                                   |
| 191-5P_Bsmut_FW   | AAGACTCCGTAGATCCAGGATGCCTAATGGAAAAATGACAGCGTGTCAATCTCTG                          |
| 191-5P_Bsmut_RV   | CAGAGATTGACACGCTGTCATTTTCCATTAGGCATCCTGGATCTACGGAGTCTT                           |
| 24-3P_Bsmut_FW    | GTTACATATTTTGATAATATCCCTAATTATAAATAAGCGAGTGTATATAGTTTGAAAACAATGCTTCTCCTCATTGCA   |
| 24-3P_Bsmut_RV    | TGCAATGAGGAGAAGCATTGTTTTCAAACCTATATAACACTCGCTTATTATAATTAGGGATATTATCAAAAATATGTAAC |
| 423-5P_Bsmut_FW   | TTATCAAAAATATGTAACCATGAGGCGGGAGAGGTCCTGATCAGTCAGAATGGATG                         |
| 423-5P_Bsmut_RV   | CATCCATTCTGACTGATCAGGACCTCTCCCGCCTCATGGTTACATATTTTGATAA                          |
| 532-3P_Bsmut_FW   | CCAGTGGGAGAGCAGTGGCAGTCCCTCGCATCTGGGGGC                                          |
| 532-3P_Bsmut_RV   | GCCCCCAGATGCGAGGGACTGCCACTGCTCTCCCCACTGG                                         |
| 3UTR_GSP1         | AGTTGTATAATACTGAAG                                                               |
| A_FW1             | CTGTTGCTGCTGACTCCAAG                                                             |
| A_RV1             | TCCGTAGATCCAGGAACGGAA                                                            |
| A_FW2             | TGAGGCATGAGTTTGCCAC                                                              |
| B_FW1             | TGGCCCAGGCAAGATAAATA                                                             |
| B_RV1             | TGGTCAAAGCATCCATTCTG                                                             |
| B_FW2             | CATTGATTACGACTTCCCTTACCAC                                                        |
| B_FW3             | CTTCTAACCCAGAGAACACAGC                                                           |
| B_FW4             | CCTGGTGTCCATGCTTTTGTGA                                                           |
| B_FW5             | CTCAGTTTCTGGTTACATCTGA                                                           |
| B_FW6             | GCTGGCACTGCGAGCAATATA                                                            |
| 3UTR_RV           | TGAGGGGCCTCATGGTTACA                                                             |

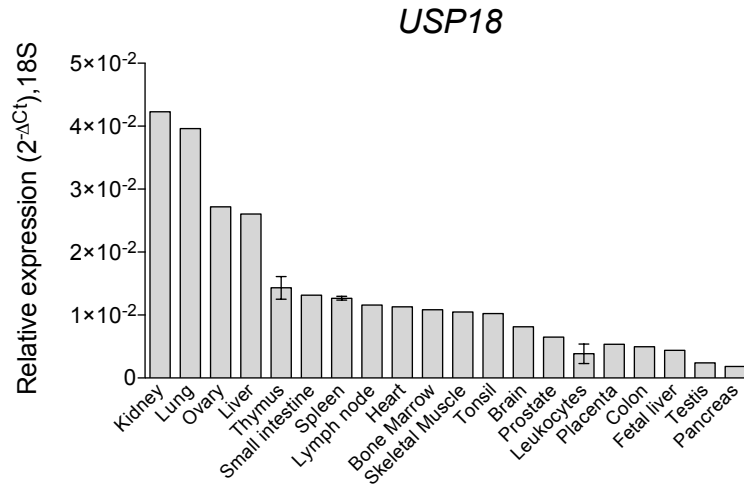

**Supplementary Figure S1. *USP18* is widely expressed in human tissues.**

Expression of *USP18* in 20 human tissues (Human Immune System MTC™ Panel, Human MTC™ Panel I, Human MTC™ Panel II). Results shown as expression ( $2^{-\Delta C_t}$ ) relative to *ACTB*, used as housekeeping gene. SEM is shown for tissues that are present in Human Immune System MTC™ Panel and Human MTC™ Panel I.

**A**

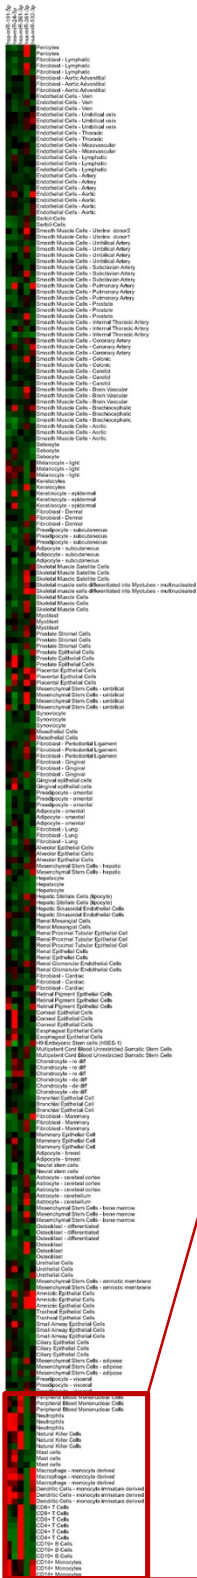

**B**

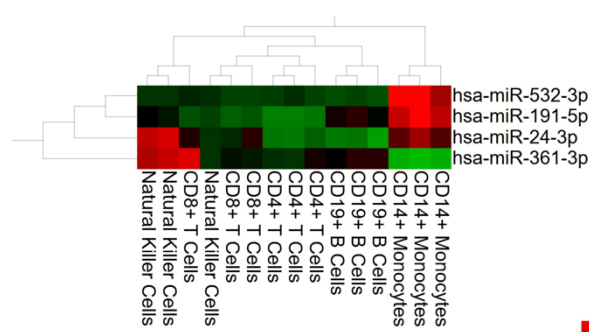

| circulating PBMCs | p-value     | q-value     |
|-------------------|-------------|-------------|
| hsa-miR-191-5p    | 2.55E-07    | 1.02E-06    |
| hsa-miR-24-3p     | 0.003559705 | 0.004746273 |
| hsa-miR-361-3p    | 0.025307131 | 0.025307131 |
| hsa-miR-532-3p    | 8.89E-07    | 1.78E-06    |

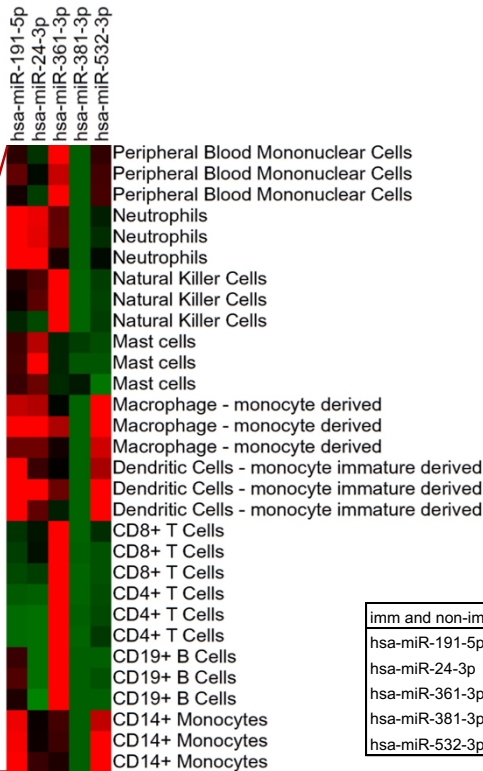

| imm and non-imm | p-value     | q-value     |
|-----------------|-------------|-------------|
| hsa-miR-191-5p  | 1.26E-18    | 4.40E-18    |
| hsa-miR-24-3p   | 0.000611121 | 0.001069462 |
| hsa-miR-361-3p  | 5.19E-38    | 3.64E-37    |
| hsa-miR-381-3p  | 9.86E-06    | 2.30E-05    |
| hsa-miR-532-3p  | 0.01453944  | 0.020355216 |

**Supplementary Figure S2. *miR-191-5p*, *miR-24-3p* and *miR-532-3p* are enriched in immune cells and particularly in monocytes.**

**(A)** Heat map visualization of the data in Figure 2A. Differential expression of *miR-191-5p*, *miR-24-3p*, *miR-361-3p*, *miR-381-3p* and *miR-532-3p* in 90 human cell types (immune and non-immune) is shown. Immune cells are delimited by a red box and zoomed. p-values and q-values (ANOVA FDR adjusted p-value) are shown on the right of the heat map for all significant miRNAs.

**(B)** Heat map visualization of the data in Figure 2B. Differential expression of *miR-191-5p*, *miR-24-3p*, *miR-361-3p* and *miR-532-3p* in circulating PBMCs is shown. p-values and q-values (ANOVA FDR adjusted p-value) are shown below the heat map for all significant miRNAs.

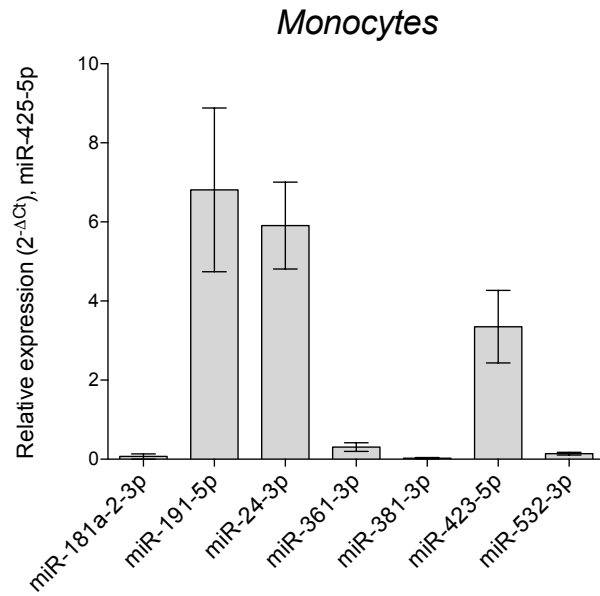

**Supplementary Figure S3. *USP18*-targeting miRNAs in monocytes.**

The expression of the indicated *USP18*-targeting miRNAs in monocytes was measured by miRNA qPCR-array. *miR-425-5p* was used as normalizer

**A**

miRNA: **miR-191-5p**  
 Human CAACGGAAUCCCAAAGCAGCUG  
 Rhesus macaque CAACGGAAUCCCAAAGCAGCUG  
 Mouse CAACGGAAUCCCAAAGCAGCUG

**miR-24-3p**  
 Human UGGCUCAGUUCAGCAGGAACAG  
 Rhesus macaque UGGCUCAGUUCAGCAGGAACAG  
 Mouse UGGCUCAGUUCAGCAGGAACAG

**miR-423-5p**  
 Human UGAGGGGCAGAGCGAGACUUU  
 Rhesus macaque UGAGGGGCAGAGCGAGACUUU  
 Mouse UGAGGGGCAGAGCGAGACUUU

**miR-532-3p**  
 Human CCUCCACACCCAAAGGUUGCA  
 Rhesus macaque CCUCCACACCCAAAGGUUGCA  
 Mouse CCUCCACACCCAAAGGUUGCA

**B**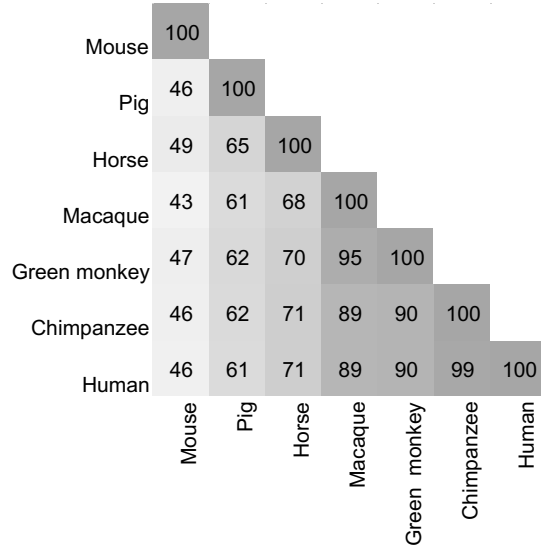**C**

|                | BS: miR-191-5p  | miR-24-3p        | miR-423-5p                                | miR-532-3p      |
|----------------|-----------------|------------------|-------------------------------------------|-----------------|
| Human          | <b>TTCCGTT</b>  | <b>AACTGAGCC</b> | <b>GCCCC</b> ----- <b>TC</b> --- <b>A</b> | <b>GTGGGAGG</b> |
| Chimpanzee     | <b>TTCCGTT</b>  | <b>AACTGAGCC</b> | <b>GCCCC</b> ----- <b>TC</b> --- <b>A</b> | <b>GTGGGAGG</b> |
| Green monkey   | <b>TGGATCT</b>  | <b>AACTAGCC</b>  | <b>GGTCC</b> ----- <b>TC</b> --- <b>A</b> | <b>GTGGGAGG</b> |
| Rhesus macaque | <b>TGGATCT</b>  | <b>AACTGAGCC</b> | <b>GGTCC</b> ----- <b>TC</b> --- <b>A</b> | <b>GTGGGAGG</b> |
| Horse          | <b>TTTGGTT</b>  | <b>AAATAACT</b>  | <b>ACTGC</b> ----- <b>CC</b> --- <b>A</b> | <b>GTGGAGG</b>  |
| Pig            | <b>TT</b> ----  | <b>AAAGAACT</b>  | <b>CTTGT</b> ----- <b>GC</b> --- <b>A</b> | <b>GGGGAGC</b>  |
| Mouse          | <b>CTTG</b> --- | <b>AAATAAGCC</b> | <b>TTTGTCTCCTGAAAGCTCACACACGGA</b>        | <b>GAGCAAG</b>  |

### Supplementary Figure S4. Conservation of *USP18* 3'UTR and miRNA binding sites.

(A) Conservation of *miR-191-5p*, *miR-24-3p*, *miR-423-5p* and *miR-532-3p* mature sequence in rhesus macaque (non-human primate) and mouse. Conserved nucleotides in black. Sequences retrieved from mirbase ([www.mirbase.org](http://www.mirbase.org)).

(B) Identity matrix of *USP18* 3'UTR in mammals. Each number indicates the percentage of identity between two species. Shades of gray indicate level of conservation (low in light gray; high in dark gray). *USP18* 3'UTR sequences were downloaded from UCSC (<https://genome.ucsc.edu>). Sequences were aligned using Clustal Omega (<https://www.ebi.ac.uk/Tools/msa/clustalo>).

(C) Conservation of the seed-matched region of the binding site (BS) of *miR-191-5p*, *miR-24-3p*, *miR-423-5p* and *miR-532-3p* on the *USP18* 3'UTRs of mammals. Conserved nucleotides in black; non-conserved nucleotides in gray.



**A**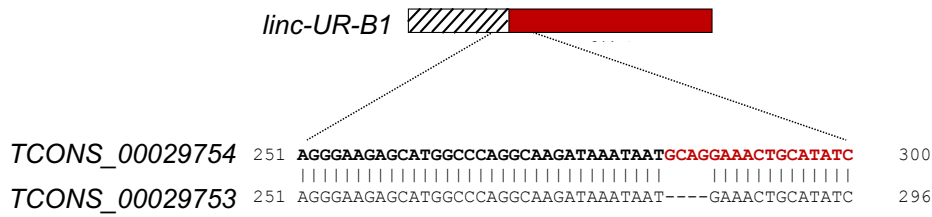**B**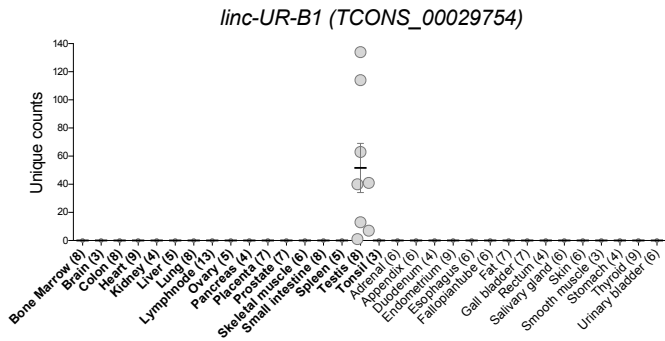**D**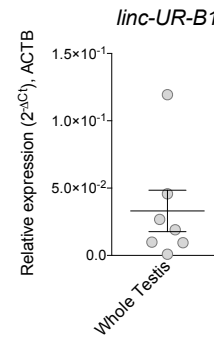**C**

```

qPCR_Testis_Seq 1 -----TGGCCCAGGCAAGATAAAATAATGCAGGAAACTGCATATC 39
                    |||
TCONS_00029754 251 AGGGAAGAGCATGGCCCAGGCAAGATAAAATAATGCAGGAAACTGCATATC 300

```

**Supplementary Figure S5. *TCONS\_00029754* is the *linc-UR-B1* isoform expressed in testis.**

**(A)** Alignment of the exon-exon junction of *TCONS\_00029754* and *TCONS\_00029753* (putative *linc-UR-B1* isoforms). In the alignment, gaps are indicated with dashes. Note that an ATG codon in frame with the last 46 coding nucleotides of *USP18* is present only in *TCONS\_00029754*.

**(B)** Expression of *TCONS\_00029754*, here called *linc-UR-B1*, in 32 human tissues (RNA-seq data from <https://www.ebi.ac.uk/gxa/experiments/E-MTAB-2836/Results>), shown as unique counts. In bold the tissues in common with tissues in the panel analyzed by qPCR in Figure 4G. The other tissues are unique to this dataset. The number of donors is shown in brackets. *linc-UR-B1* detected only in testis (8 donors).

**(C)** Sequencing of the qPCR product obtained from testis cDNA in Figure 4G, revealed that the isoform of *linc-UR-B1* expressed in testis is *TCONS\_00029754*.

**(D)** Expression of *linc-UR-B1* in testis fragments (7 donors), measured by qPCR. Expression is shown as relative ( $2^{-\Delta Ct}$ ) to *ACTB*. The donor with the lowest expression of *linc-UR-B1* had impaired spermatogenesis, while the other six donors

**A**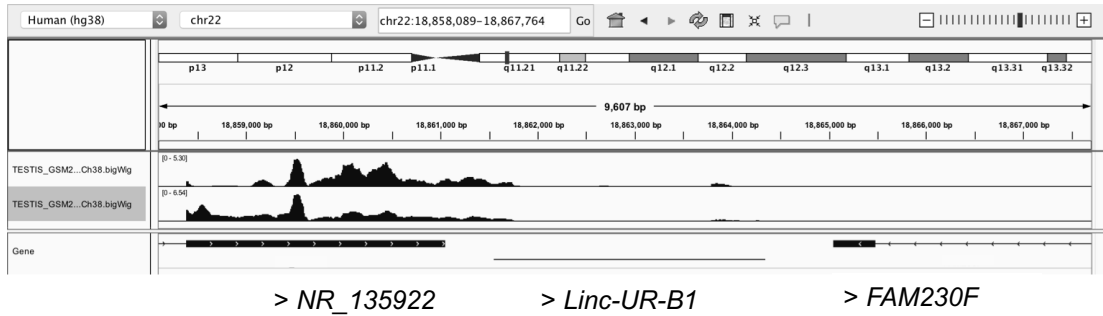**B**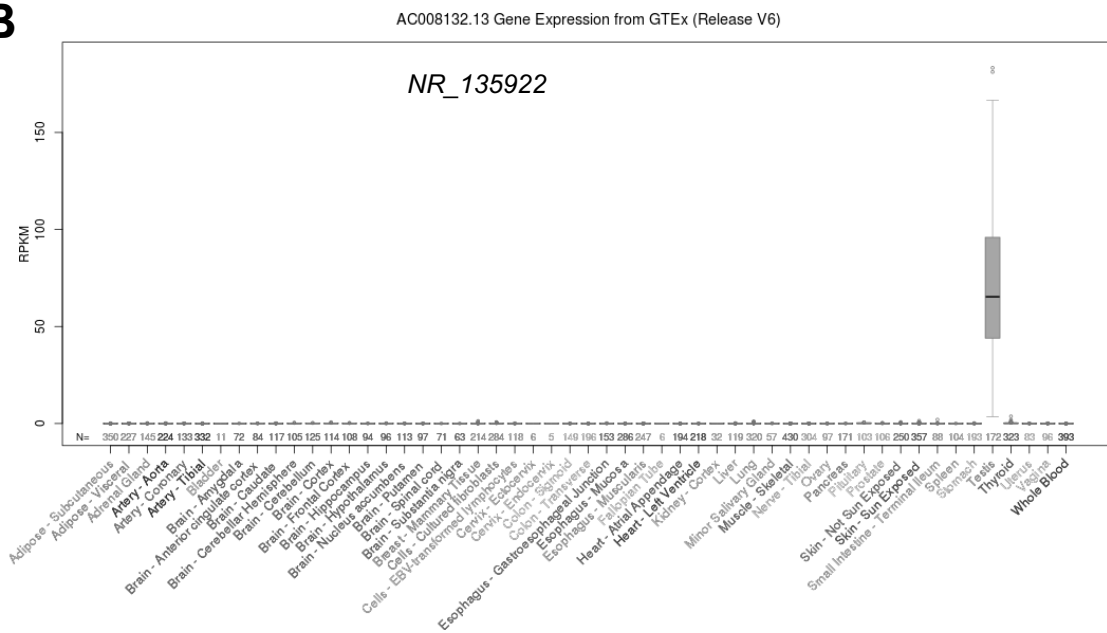

**Supplementary Figure S6. The *NR\_135922* pseudogene is uniquely expressed in testis.**

(A) PolyA+ RNA-seq (+ strand) track from testis provided by the ENCODE project (GSM2453457 and GSM2453458) were visualized using auto-scale mode in IGV browser (hg38 genome assembly). Genes are shown with their genomic orientation (> for + strand, < for - strand). *NR\_135922* and the annotated intergenic region upstream of *linc-UR-B1* is covered by reads.

(B) Expression of *NR\_135922* in GTEx data, retrieved from UCSC. *NR\_135922* gene is under the name AC008132.12 and is expressed only in testis.

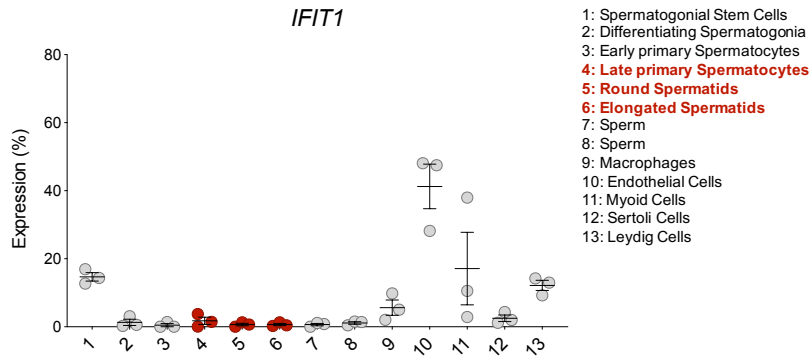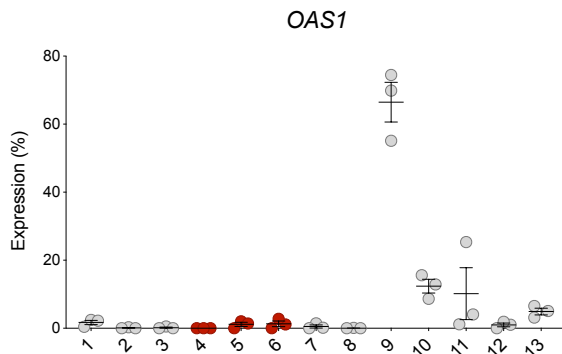

**Supplementary Figure S7. No or low expression of ISGs in germ cells.**

Analysis of *IFIT1* and *OAS1* in testicular cell populations (cluster 1-13, 3 donors). These data were retrieved from the alignment of single cell RNA-seq reads provided by (19), filtered for unique reads and expressed as percentage expression (normalized expression in one population vs all populations analyzed). Cell populations expressing *linc-UR-B1* are highlighted in red.

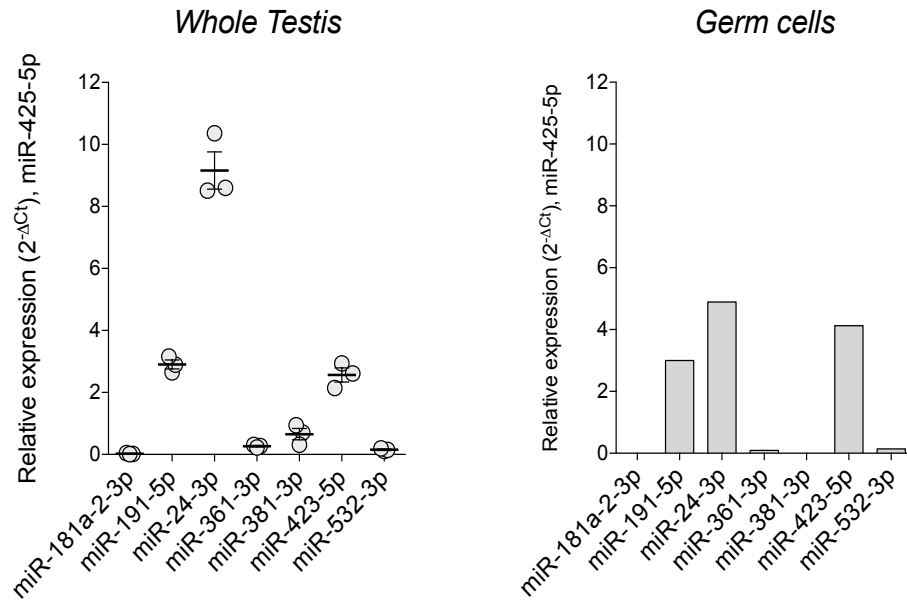

**Supplementary Figure S8. *USP18*-targeting miRNA are expressed in whole testis and germ cells.**

The expression of *USP18*-targeting miRNAs in testis fragments (left panel) and on purified germ cells (right panel) was measured by miRNA qPCR-array. *miR-425-5p* was used as normalizer.

**A**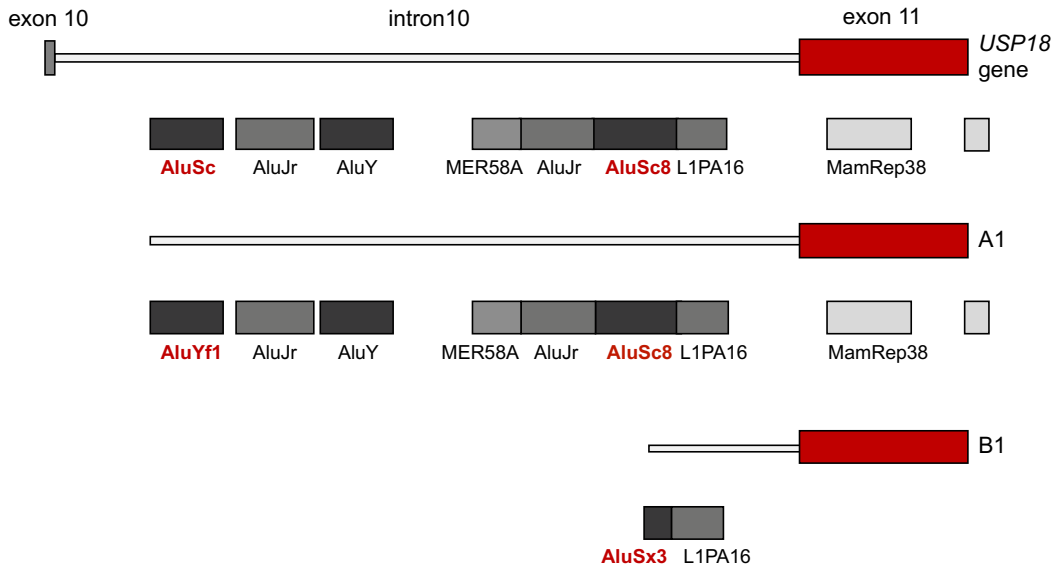**B**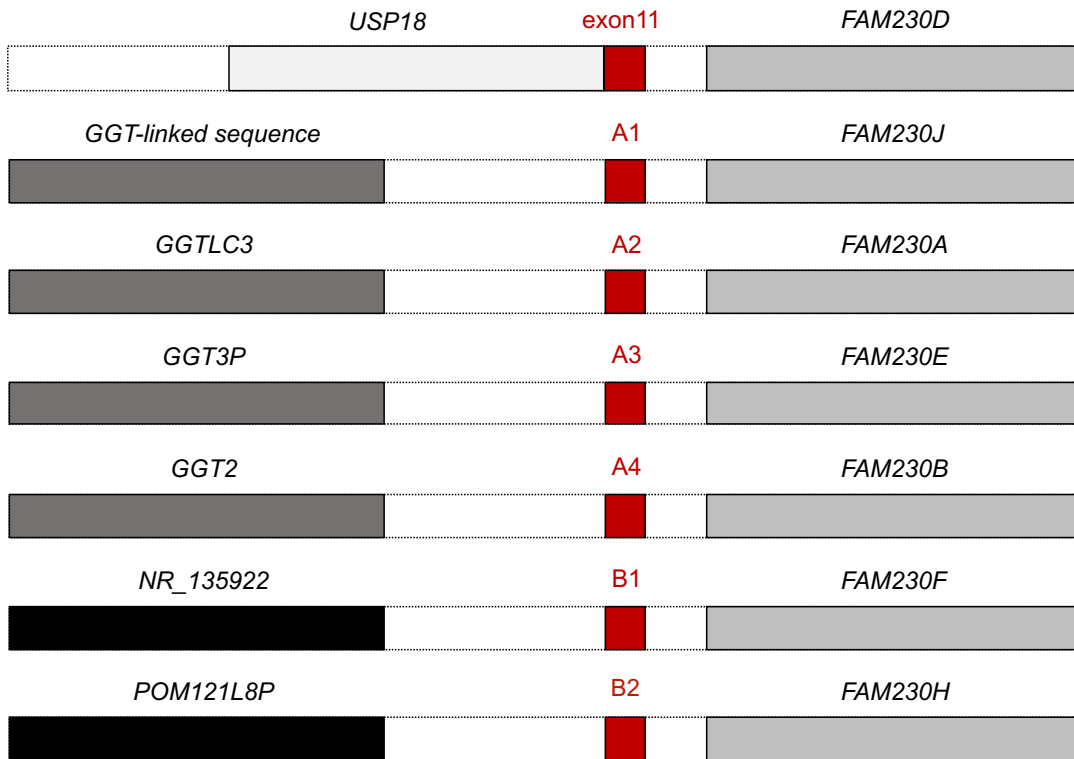

**Supplementary Figure S9. *USP18* intron 10-exon 11 copies contain *Alu* elements at their breakpoints and are part of repeated gene blocks.**

**(A)** Repeated elements present in the A and B copies (A1 and B1 are shown as representatives). The *Alu* sequences at the breakpoint of the A and B copies are shown in red. Exons are shown as boxes, intron as thick lines. Sequences identical to *USP18* exon 11 are in red.

**(B)** *USP18* exon 11, A copies and B copies are shown in red. *FAM230*-linked sequences/genes are found downstream of A and B copies. GGT-linked sequences/genes are shown upstream of A copies. POM121-related sequences/genes (*POM121L8P* and *NR\_135922*) are found upstream of the B copies. Genes/sequences are shown with their genomic orientation (> for + strand, < for – strand).

## Supplementary sequences

### A) Human USP18 3'UTR

The cDNA sequence of USP18 exon11 is shown in red. The 43 coding nt are in bold, the stop codon (TAA) is underlined, the rest of exon11 represents USP18 3'UTR. This sequence was downloaded from UCSC genome browser.

```
GCAGGAACTGCATATCTTCTGGTTTACATGAAGATGGAGTGCTAATGGAAATGCCAAAACCTTCAGA
GATTGACACGCTGTCATTTCCATTTCCGTTCTGGATCTACGGAGTCTTCTAAGAGATTTTGAATGAGGAG
AAGCATTGTTTCAAACCTATATAACTGAGCCTTATTATAATTAGGGATATTATCAAAATATGTAACCATGAG
GCCCCTCAGGTCCTGATCAGTCAGAAATGGATGCTTACCAGCAGACCCGGCCATGTGGCTGCTCGGTCTG
GGTCTCGCTGCTGTGCAAGACATTAGCCCTTTAGTTATGAGCCTGTGGGAACTTCAGGGGTTCCCAAGTGG
GAGAGCAGTGGCAGTGGGAGGCATCTGGGGGCCAAAGGTCAGTGGCAGGGGGTATTTTCAGTATTATACAAC
TGCTGTGACCAGACTGTATACTGGCTGAATATCAGTGTCTTTGTAATTTTCACTTTGAGAACCAACATTA
ATCCATATGAATCAAGTGTGTTGTAAGTCTATTCATTTATTTCAGCAAATATTTATTGATCATCTCTTCTCCA
TAAGATAGTGTGATAAACACAGTCATGAATAAAGTTATTTTCCACAAAA
```

### B) FAM247A, FAM247C, FAM247D

These transcripts have nearly identical sequence. The following cDNA sequence was obtained by sequencing two overlapping PCR products: the first obtained with A\_FW1 primer and AUAP\_RV and the second with the A\_FW2 primer and the 3'UTR\_RV primer (**Figure 5A**). Of note, the genes of FAM247A, C and D are annotated in the UCSC database as LOC105372935, LOC105377182 and LOC105372942 respectively, and the corresponding annotations for transcripts are XR\_938017.2, XR\_951239.1 and XR\_951230.1.

```
TGAGGCATGAGTTTGGCCACTCCGTAGTGTGCACTTGGTGAGGGCAGCAGCTCGCCACAGCTGCCAGCCATC
TGTCATTACCCATCTGTCCATCTGGCAGCCCGCTGTTCAGACCTGTCTGTCTGTCCGCCATCTGTAAGCC
CATCTCTGTCCATTGTCTATCTGACCATCTTCTCTTACTGTCTCTTTGTCTAGCTATCTGGCCTGTCTGTGC
ATCCATCTTCGTGTCTGTCTTCAGCCCCACCTGTTTGTCCATCTGTCCAATTACCTGTGAGTCTATCTATGCA
TCTTCTTGCATTATCTGCCCACCCATCTGTCCCTCCATCTGCCACCCGGCCTCCCTCTCCTTCTGGGCGC
CAGAGCCATGGCCAGGACTACGGAGCCATGGGTGACCTGGTCTGCTGGGGCTGGGGCTGGGGCTGGCGC
TGGCTGTCAATTGTGCTGGCTGTGGTCTCTCTCGACACCAGGCCCATTTGACCCCGGCCTTTGCCACACC
GCTGTTGCTGTGACTCCAAGTCTTCTCAAATATTGTACGGCAGGAACTGCATATCTTCTGGTTTACAT
GAAGATGGAGTGTCTAATGGAAATGCCAAAACCTTCAGAGATTGACACGCTGTCATTTTCCATTTCCGTTCC
TGGATCTACGGAGTCTTCTAAGAGATTTTGAATGAGGAGAAGCATTGTTTTCAAACCTATATAACTGAGCCTT
ATTTATAATTAGGGATATTATCAAAATATGTAACCATGAGGCCCTCAGGTCCTGATCAGTCAGAAATGGATG
CTTTCACCAGCAGACCCGGCCATGTGGCTGCTCGGTCTGGGTGCTCGCTGCTGTGCGAGACATTAGCCCTTT
AGTTATGAGCCTGTGGAACTTCAGGGGTCCAGTGGGGAGAGCAGTGGCAGTGGGAGGCATCTGGGGGC
CAAAGGTCAGTGGCGGGGGTATTTTCAGTATTATACAACCTGCTGTGACCAGACTGTATACTGGCTGAATAT
CAGTGTCTTTGTAATTTTCACTTTGAGAACCAACATTAATCCATATGAATCAAGTGTGTTGTAAGTCTAT
TCATTTATTTCAGCAAATATTTATTGATCATCTCTTCTCCATAAGATAGTGTGATAAACACAGTCATGAATAAA
GTTATTTTCCACAAAA
```

### C) Partial *linc-UR-B1*

*linc-UR-B1* is a fusion of *NR\_135922*, the genomic sequence between the annotated *NR\_135922* and *TCONS\_00029754*, and *TCONS\_00029754*. This partial sequence was obtained by sequencing two overlapping PCR products: the first obtained with B\_FW1



primer and AUAP\_RV (**Figure 5B**) and the second with the B\_FW6 primer (pairing to the exon6 of *NR\_135922*) and the 3'UTR\_RV primer (**Figure 5C**). The different parts of *linc-UR-B1* cDNA sequence are shown in different colours, depending on their origin: partial exon6 of *NR\_135922* in grey (nt in white), intergenic region in white (nt in grey), the annotated exon1 of *TCONS\_00029754* in black and the *USP18* exon11 in red. The ATG formed by the junction of *USP18* exon11 and the upstream exon is underlined, as well as the stop codon (TAA).

```

TTTTCCAGGATCAGACTAACGGCTAAAGAGACTGATGCATCAACACCAGGCAGAGAATAAAGCAGATTI
TTTTGTGTTTTGTTTGGAGAGCCTTAGGAACTTGAAAAATACATATGCCACACTCTTAAGACCCGGTG
GTTCTTAATCAGGGATGTTTCATTAATAATGCTGGAAAACTCTAAAGATTTCCAGGTCCCATCCAAGGAG
ATTTTGCTTCTGATTGACTGGCTAGTGGCCTGGCCATTGGTATTTTGAAAAATCCCTCCAAGTGATTCT
TTTACATCCCAGCTAGAAAAACCTAAATTAAGGTGAAAAACCAGACACCAAGTGGCATTAAATAAAA
TGTCAACTTAACTCCACAAAGCATCTGGTTCATGTGGACAGAAAGAGAAGGAAAGAGGGCCCTATA
TCTGGATAAATGGAAATGTGCTCCCCCTAGCAAGATATCTACAAAAATTAACCATAATTTGAGGATG
CTGGCAGCTGGAGCAATATATAAATGATGCATGTAACATCATTTAATATGATCTTATTTTTAAAAATGA
GTAGAGTGGTGTCTTAGCTGTTAGTGTTCCTCAAAATATCAATGTAGAAAATTAGCCTTCTGCAGCTGCA
GAGGCAATTCAGTTTGCAGCTTGTTCATGTGGCCTAGAGCCACCAGCCTGATATGTACTAATTTT
TTATGTTTAACTTGCAGAGTAGAAACTCAGTTTCTGGGCGAGGCATAGTGGCTCATGCCTGTAATCC
CAGAACTTTGGGAGGCCAAGGCAAGCAGATCAAAAGGTCGGGAGTTCAAGACCAGCCTGGCTGACAT
AGTGAAAACCCCTATCTTTGCTAAAAATACAAAAATTAGCCCGGCATGGTGGCAGGCACCTGTAGTCCCA
GCTACTTGGGAGGCTGAGGCAGGAGAATCACTTGAACCTGGGAGGCAGAGGTTGTGGTGAAGTGAAG
TCATGCCCCCTGCACTCCAGCCTGGGCAACAGAGTGAGACTCCATCTCAAAAAAAAAAAAAAAAAAGAAA
CTCAGTTTCTGGTTACATCTGATCTTTATTTTTATATATCATCTAAGCTATAAAAGTTATATTCCTATTTGTGA
TCTTAAAAAGAAGGACTCCAGGAAAAGTGTTCAAATATTCATATATCTAAACTGGAACATATGTTTATATTTTTA
AAAGTAGCCTGAGAGGTTGGCAACTAAAGTCATATGTTGAATGATCATTCTCAAGAGTTTCATTTTATGGTC
TTTCTCTGTTCTGTAAAAATGTGGGCATGGATAGATATAAAGTGCCTGGTGTCCATGCTTTTGTGAAATCCCT
TCCTCTTCCATGTGAATGGGACCTGTGACTTCTTCTAATCCAGAGAAACACAGCAAAAAATGATGTGATTTATC
TGAGTCCATTGATGACATTGATTACGACTTCCCTTACCACATTATTTAGGACTGCGTCGTAGGAGACT
GGGACACATATCCACTTTGCTGGCTTGATGAAGTAAACTGCTAAGTTGAGGAAGCCCACATGGCAAGG
AACTGTGGGCAGCCTCAGCCAACAGGCAGCAAAAAGCTGAGCTCCTCGGAGCTACAGCCTCAAGGA
AGTTACTTCTGTAAACAACCTGAAAAAGCTTGGAAAGCTAGTTTCTCTCTAGTGGAAATTTTTAGGGAAGA
GCATGGCCCAGGCAAGATAAATAATGCAGGAAACTGCATATCTTCTGGTTTACATGAAGATGGAGTGC
TAAATGGAAATGCCAAAACCTTCAGAGATTGACACGCTGTCATTTTCCATTTCCTGGATCTACGGAGT
CTTCTAAGAGATTTTGAATGAGGAGAAGCATTGTTTTCAAACATATAACTGAGCCTATTTATAATTAGGG
ATATTATCAAAATATGTAACCATGAGGCCCTCAGGTCTGATCAGTCAGAATGGATGCTTTCACCAGCAGA
CCCGGCATGTGGCTGCTCGGTCTGGGTGCTCGTGTGCGGAGACATTAGCCCTTAGTTATGAGCCTGT
GGGAACCTCAGGGGTTCCAGTGGGGAGAGCAGTGGCAGTGGGAGGCATCTGGGGGCCAAAAGTCAAGTGGC
AGGGGGTACTTCAGTATTATACAACCTGCTGTGACCAGACTTGTATACTGGCCGAATATCAGTGCTGTTGTAA
TTTTTCACTTTGAGAACCAACATTAATTCCATATGAATCAAGTGTGTTTGTAACTGCTATTCAATTTATCAGCAA
ATATTTATTGATCATCTCTCTCCATAAGATAGTGTGATAAACACAGTCATGAATAAAGTTATTTCCACAAA
A

```
